# Supplementary material for: Möbius basket molecule: structure and properties
Source: Royal Society of Chemistry journal article supplement (doi:10.1039/b927344a), 2010-01-01
Supplement: b927344a.pdf [file b927344a.pdf]

## **Möbius Basket Molecule: Structure and Properties**

Yin-Feng Wang,<sup>1</sup> Zhuo Li,<sup>1</sup> Zhi-Ru Li,<sup>1\*</sup> Zong-Jun Li,<sup>2</sup> Di Wu,<sup>1</sup> Ying Li,<sup>1</sup> Fang Ma,<sup>1</sup>  
Chia-Chung Sun<sup>1</sup>

<sup>1</sup> *State Key Laboratory of Theoretical and Computational Chemistry, Institute of  
Theoretical Chemistry Jilin University, Changchun, 130023, China,*

*E-mail: [lzh@jlu.edu.cn](mailto:lzr@jlu.edu.cn)*

<sup>2</sup> *State Key Laboratory of Electroanalytical Chemistry, Changchun Institute of Applied  
Chemistry, Graduate School of Chinese Academy of Sciences, Chinese Academy of  
Sciences, Changchun, 130022, China.*

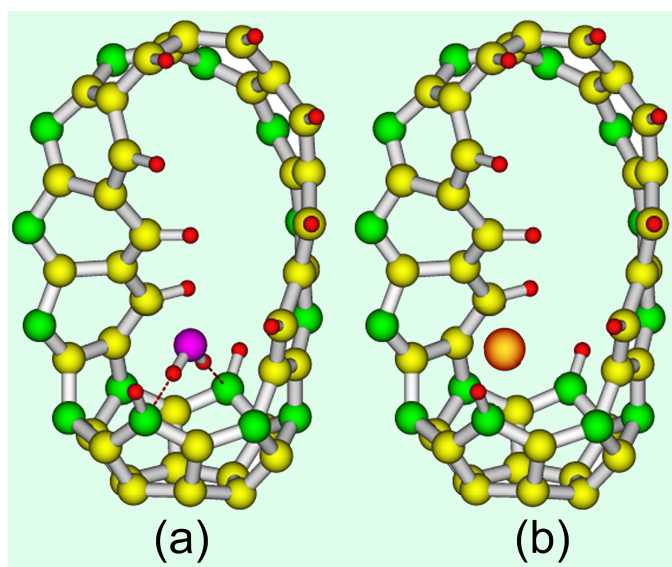

**Fig. S1.** (a) Complex  $\text{H}_2\text{O} \cdots$  Möbius basket, and (b) complex  $\text{Fe}^{2+} \cdots$  Möbius basket showing the container characteristic of the Möbius basket.

B3LYP/6-31G(d) level for the optimized Cartesian Coordinates.

Möbius Basket. -2219.9585 au.

|   |             |             |             |
|---|-------------|-------------|-------------|
| C | -4.61431000 | 2.06414500  | -0.83013800 |
| N | -5.22756800 | 1.12331000  | -1.56802500 |
| C | -5.59453900 | 1.19893400  | 1.25786900  |
| H | -5.72434000 | 1.22491800  | 2.33849100  |
| H | -3.95298400 | 2.96376700  | 2.44959800  |
| C | -3.86127400 | 2.89896000  | 1.36656700  |
| C | -4.81541600 | 2.17685500  | 0.62080200  |
| N | -3.60363100 | 2.70057000  | -1.46264800 |
| C | 1.98289500  | 2.57706500  | -0.65550000 |
| C | 2.10277400  | 2.60868300  | 0.80867000  |
| C | 1.00314600  | 2.90765200  | 1.54304800  |
| C | -0.25506200 | 3.00621300  | -0.63376800 |
| C | -0.23262100 | 3.10794700  | 0.83358100  |
| H | 1.02332500  | 2.96154500  | 2.62822900  |
| N | 0.90967200  | 2.76849900  | -1.34713200 |
| C | -4.80425000 | -2.19031500 | 0.61889300  |
| C | -4.60328400 | -2.07504100 | -0.83189100 |
| C | -5.76458200 | -0.00911900 | 0.55693500  |
| C | -0.21640700 | -3.10318500 | 0.83147900  |
| C | -0.23969700 | -3.00182000 | -0.63661400 |
| C | 2.11882400  | -2.59931300 | 0.80942000  |
| C | 1.99613400  | -2.56505900 | -0.66020600 |
| C | -5.50891000 | -0.00777700 | -0.89084200 |
| C | -5.58828200 | -1.21774900 | 1.25671900  |
| C | -3.84650800 | -2.90955200 | 1.36408400  |
| C | 1.01835900  | -2.90178700 | 1.54227700  |
| N | -5.22143600 | -1.13608300 | -1.56900100 |
| N | -3.59012900 | -2.70587300 | -1.46488500 |
| N | 0.92259100  | -2.76137400 | -1.35064400 |
| H | -5.71826100 | -1.24548600 | 2.33727300  |
| H | -3.93832400 | -2.97614800 | 2.44699100  |
| H | 1.03825900  | -2.96015500 | 2.62707800  |
| N | 3.26764800  | -2.28039400 | -1.17607100 |
| C | 3.74211500  | -1.14315800 | -1.95885000 |
| C | 4.14578200  | -2.31420000 | -0.07419400 |
| N | 2.95781500  | -0.00283000 | -2.27585500 |
| C | 4.93853900  | -0.70770500 | -1.39107400 |
| N | 3.45009700  | -2.30697400 | 1.15058100  |
| C | 5.19894800  | -1.45045200 | -0.15287400 |
| C | 3.69420000  | 1.11803400  | -1.87420800 |
| H | 2.14922500  | 0.00724300  | -2.88767300 |

|   |             |             |             |
|---|-------------|-------------|-------------|
| C | 4.93014400  | 0.71988900  | -1.37927600 |
| C | 4.02944100  | -1.15937800 | 1.85648300  |
| C | 5.11468900  | -0.71533600 | 1.10656900  |
| N | 3.25492800  | 2.29551000  | -1.17745100 |
| C | 5.17833000  | 1.47112300  | -0.15236600 |
| N | 3.27469900  | -0.01134700 | 2.27387300  |
| C | 5.10274600  | 0.71713100  | 1.09204400  |
| C | 4.17172300  | 2.39450400  | -0.07420600 |
| C | 3.95722000  | 1.11422900  | 1.75856600  |
| H | 2.75410400  | 0.01508900  | 3.14552000  |
| N | 3.43468100  | 2.31389100  | 1.16140900  |
| C | -1.43913800 | 3.30059600  | 1.47925400  |
| H | -1.47347300 | 3.37844900  | 2.56469300  |
| C | -1.42232400 | -3.30114900 | 1.47650500  |
| H | -1.45648100 | -3.38033500 | 2.56184400  |
| C | -2.54404500 | -3.05192200 | -0.71047000 |
| C | -2.63096900 | -3.19689500 | 0.74483800  |
| C | -2.64680800 | 3.19313200  | 0.74728200  |
| C | -2.55933900 | 3.04968500  | -0.70800100 |
| N | -1.35988900 | 3.08824000  | -1.34990600 |
| N | -1.34526500 | -3.08686900 | -1.35231700 |

Normal Basket. -2220.0836 au.

|   |             |             |             |
|---|-------------|-------------|-------------|
| C | -4.61431000 | 2.06414500  | -0.83013800 |
| N | -5.22756800 | 1.12331000  | -1.56802500 |
| C | -5.59453900 | 1.19893400  | 1.25786900  |
| H | -5.72434000 | 1.22491800  | 2.33849100  |
| H | -3.95298400 | 2.96376700  | 2.44959800  |
| C | -3.86127400 | 2.89896000  | 1.36656700  |
| C | -4.81541600 | 2.17685500  | 0.62080200  |
| N | -3.60363100 | 2.70057000  | -1.46264800 |
| C | 1.98289500  | 2.57706500  | -0.65550000 |
| C | 2.10277400  | 2.60868300  | 0.80867000  |
| C | 1.00314600  | 2.90765200  | 1.54304800  |
| C | -0.25506200 | 3.00621300  | -0.63376800 |
| C | -0.23262100 | 3.10794700  | 0.83358100  |
| H | 1.02332500  | 2.96154500  | 2.62822900  |
| N | 0.90967200  | 2.76849900  | -1.34713200 |
| C | -4.80425000 | -2.19031500 | 0.61889300  |
| C | -4.60328400 | -2.07504100 | -0.83189100 |
| C | -5.76458200 | -0.00911900 | 0.55693500  |
| C | -0.21640700 | -3.10318500 | 0.83147900  |
| C | -0.23969700 | -3.00182000 | -0.63661400 |
| C | 2.11882400  | -2.59931300 | 0.80942000  |

|   |             |             |             |
|---|-------------|-------------|-------------|
| C | 1.99613400  | -2.56505900 | -0.66020600 |
| C | -5.50891000 | -0.00777700 | -0.89084200 |
| C | -5.58828200 | -1.21774900 | 1.25671900  |
| C | -3.84650800 | -2.90955200 | 1.36408400  |
| C | 1.01835900  | -2.90178700 | 1.54227700  |
| N | -5.22143600 | -1.13608300 | -1.56900100 |
| N | -3.59012900 | -2.70587300 | -1.46488500 |
| N | 0.92259100  | -2.76137400 | -1.35064400 |
| H | -5.71826100 | -1.24548600 | 2.33727300  |
| H | -3.93832400 | -2.97614800 | 2.44699100  |
| H | 1.03825900  | -2.96015500 | 2.62707800  |
| N | 3.26764800  | -2.28039400 | -1.17607100 |
| C | 3.74211500  | -1.14315800 | -1.95885000 |
| C | 4.14578200  | -2.31420000 | -0.07419400 |
| N | 2.95781500  | -0.00283000 | -2.27585500 |
| C | 4.93853900  | -0.70770500 | -1.39107400 |
| N | 3.45009700  | -2.30697400 | 1.15058100  |
| C | 5.19894800  | -1.45045200 | -0.15287400 |
| C | 3.69420000  | 1.11803400  | -1.87420800 |
| H | 2.14922500  | 0.00724300  | -2.88767300 |
| C | 4.93014400  | 0.71988900  | -1.37927600 |
| C | 4.02944100  | -1.15937800 | 1.85648300  |
| C | 5.11468900  | -0.71533600 | 1.10656900  |
| N | 3.25492800  | 2.29551000  | -1.17745100 |
| C | 5.17833000  | 1.47112300  | -0.15236600 |
| N | 3.27469900  | -0.01134700 | 2.27387300  |
| C | 5.10274600  | 0.71713100  | 1.09204400  |
| C | 4.17172300  | 2.39450400  | -0.07420600 |
| C | 3.95722000  | 1.11422900  | 1.75856600  |
| H | 2.75410400  | 0.01508900  | 3.14552000  |
| N | 3.43468100  | 2.31389100  | 1.16140900  |
| C | -1.43913800 | 3.30059600  | 1.47925400  |
| H | -1.47347300 | 3.37844900  | 2.56469300  |
| C | -1.42232400 | -3.30114900 | 1.47650500  |
| H | -1.45648100 | -3.38033500 | 2.56184400  |
| C | -2.54404500 | -3.05192200 | -0.71047000 |
| C | -2.63096900 | -3.19689500 | 0.74483800  |
| C | -2.64680800 | 3.19313200  | 0.74728200  |
| C | -2.55933900 | 3.04968500  | -0.70800100 |
| N | -1.35988900 | 3.08824000  | -1.34990600 |
| N | -1.34526500 | -3.08686900 | -1.35231700 |
